# Supplementary material
Source: PubMed Central journal article supplement (PMC3190896)
Supplement: supp_M111.269894_jbc.M111.269894-2.pdf [file supp_M111.269894_jbc.M111.269894-2.pdf]

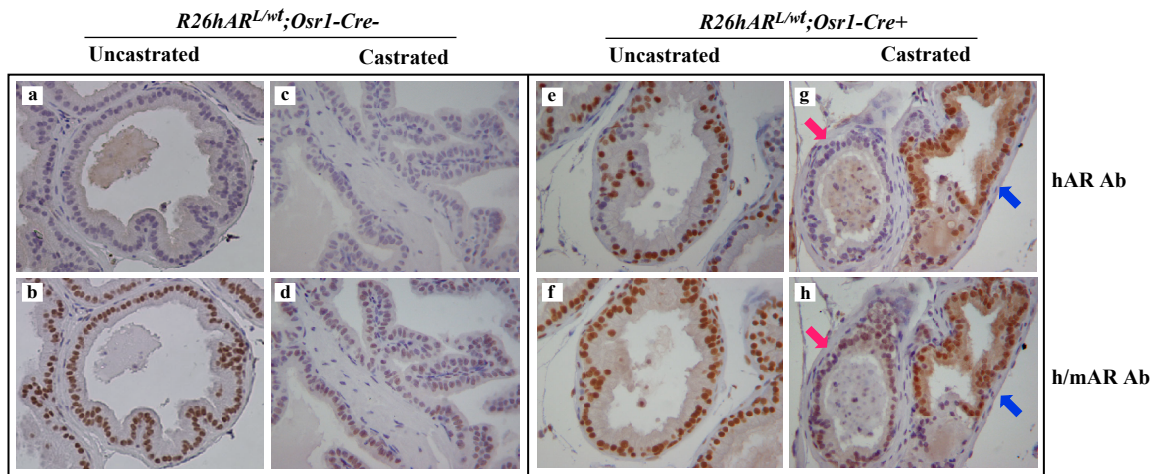

**Supplemental Figure 2.** Expression of the AR transgene is not affected by castration in *R26hAR<sup>L/wt</sup>;Osr1-Cre<sup>+</sup>* mice. Four pairs of 12-week-old *R26hAR<sup>L/wt</sup>;Osr1-Cre<sup>-</sup>* and *R26hAR<sup>L/wt</sup>;Osr1-Cre<sup>+</sup>* male mice were examined the effect of castration on AR transgene expression. Two mice from each genotype were castrated and sacrificed after 7 days with intact counterparts. Adjacent slides were stained with either the antibody reacting with both the human and mouse AR proteins (h/mAR Ab) or the antibody only reacting with the human AR protein (hAR Ab). The sections were lightly counterstained with haematoxylin. Representative images were shown. Expression of endogenous mouse AR protein is observed in prostate tissues of both *R26hAR<sup>L/wt</sup>;Osr1-Cre<sup>-</sup>* (**B**) and *R26hAR<sup>L/wt</sup>;Osr1-Cre<sup>+</sup>* (**F**) intact mice. However, transgenic AR expression was only detected in *R26hAR<sup>L/wt</sup>;Osr1-Cre<sup>+</sup>* mice (**E**) but not in *R26hAR<sup>L/wt</sup>;Osr1-Cre<sup>-</sup>* mice (**A**). Endogenous mouse AR expression was significantly reduced in both castrated mice (**D** & **H**, left gland with the red arrow). However, transgenic AR expression appeared unchanged between the castrated and intact *R26hAR<sup>L/wt</sup>;Osr1-Cre<sup>+</sup>* mice (**E** versus **G**, the blue arrow). Particularly, the contrasting staining between two adjacent glands in the same image (red versus blue arrows, **G** & **H**) clearly demonstrated that AR transgene expression is resistant to castration.
